# Supplementary material for: HMGB1 induces hepcidin upregulation in astrocytes and causes an acute iron surge and subsequent ferroptosis in the postischemic brain
Source: Springer Nature journal article supplement (doi:10.1038/s12276-023-01111-z), 2023-11-01
Supplement: MOESM1 [file 12276_2023_1111_MOESM1_ESM.pdf]

## **Supplementary materials**

### **HMGB1 induces hepcidin upregulation in astrocytes and causes an acute iron surge and subsequent ferroptosis in the postischemic brain**

Dashdulam Davaanyam<sup>a#</sup>, Hahnbi-Lee<sup>a#</sup>, Song-I Seol<sup>a</sup>, Sang-A Oh<sup>a</sup>, Seung-Woo Kim<sup>b</sup>, Ja-Kyeong Lee<sup>a,\*</sup>

<sup>a</sup>Department of Anatomy, Inha University School of Medicine, Incheon, 22212, Korea

<sup>b</sup>Department of Biomedical Sciences, Inha University School of Medicine, Incheon 22212, Korea

<sup>#</sup> These authors are equally contributed

Key words: HMGB1; hepcidin; iron; MCAO; astrocytes

**\*Corresponding author:**

Ja-Kyeong Lee, Ph.D.

Department of Anatomy, Inha University School of Medicine

Inharo 100, Incheon, 22202, Republic of Korea

Tel, +82-32-860-9893; [jkleee@inha.ac.kr](mailto:jkleee@inha.ac.kr)

## **Materials and Methods**

### **Staining with 2, 3, 5-triphenyl tetrazolium chloride (TTC)**

Rats were sacrificed 12 h post-MCAO, and whole brains were sliced coronally at 2 mm using a metallic brain matrix (RBM-40000, ASI, Springville, UT, USA). Tissue slices were immediately incubated in saline containing TTC (2, 3, 5-triphenyl tetrazolium chloride, 2%) for 15 min at 37 °C and then stored in 4% paraformaldehyde (PFA).

### **Primary microglial cultures**

Primary microglial cultures were prepared as described previously<sup>36</sup>. Briefly, cells dissociated from the cerebral hemispheres of 1-day-old postnatal rat brains (Sprague–Dawley strain) were seeded at a density of  $1.2 \times 10^6$  cells/mL in Dulbecco's modified Eagle's medium (DMEM; Gibco) containing 10% FBS (Hyclone, Logan, UT, USA) and 1% penicillin-streptomycin (Gibco BRL, Gaithersburg, MD, USA). After culture for 2 weeks, microglia were detached from flasks by mild shaking, and astrocytes were removed by filtering using a cell strainer (BD Falcon, Bedford, MA, USA). After centrifugation ( $1000 \times g$ ) for 5 min, cells were resuspended in fresh DMEM containing 10% FBS and 1% penicillin-streptomycin, plated at a final density of  $1.5 \times 10^5$  cells/well on a 24-well culture plate (Corning, Corning, NY, USA), and cultured for 2 h and the medium was changed to DMEM containing 5% FBS and 500  $\mu$ M B27 (Gibco BRL).

### Supplementary Figure 1

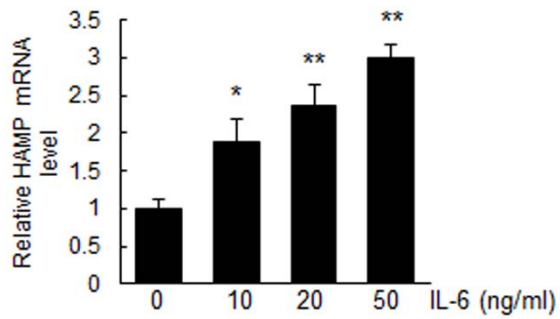

### Supplementary Fig. 1. IL-6 induces hepcidin expression in astrocytes in a dose-dependent manner

Primary astrocyte cultures were incubated with IL-6 (10, 20, or 50 ng/mL) for 6 h, and hepcidin levels were determined by RT-qPCR. The results are presented as means  $\pm$  SEMs (n=3). \*p < 0.05, \*\*p < 0.01 vs. control groups.

## Supplementary Figure 2

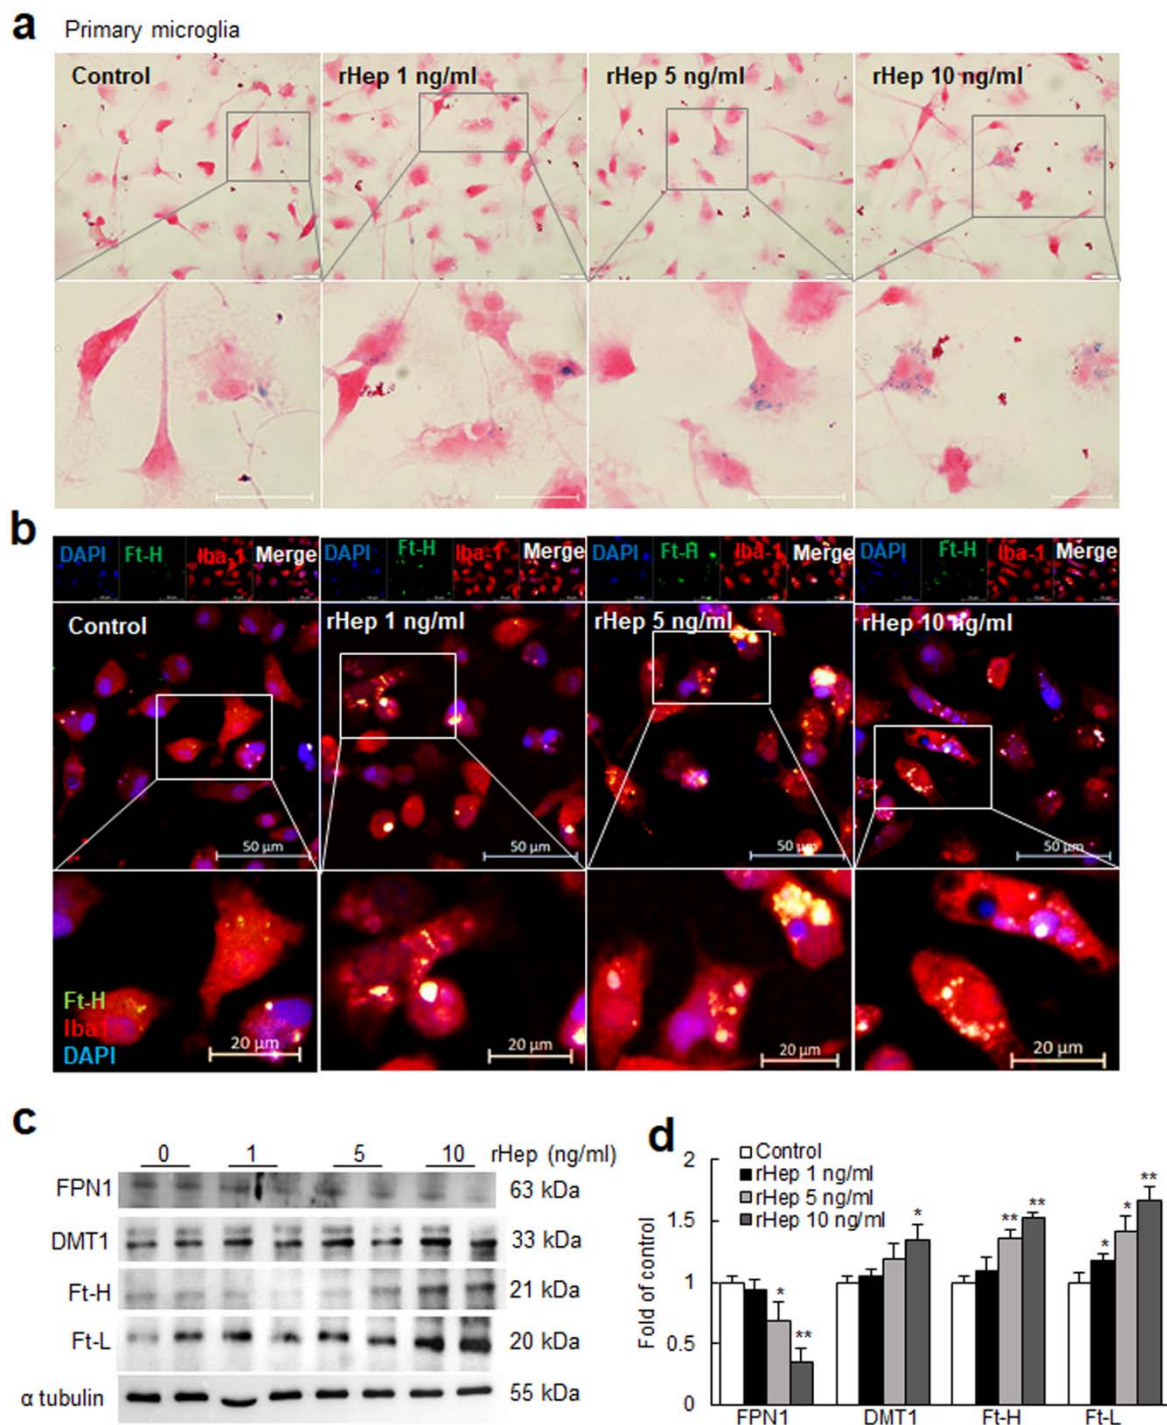

**Supplementary Fig. 2. Hepcidin upregulates intracellular iron levels in microglia and modulates levels of FPN and iron-related proteins**

Primary microglial cultures were treated with recombinant hepcidin (rHep; 1, 5, or 10 ng/mL)

for 24 h. (a) Prussian blue staining was performed, and nuclear fast red staining was carried out as a counter-staining to show the position of the nucleus. The lower panels in a show higher magnifications of the boxed regions in the upper panel. (b) Triple immunofluorescence staining was performed with an anti-ferritin heavy chain (Ft-H) antibody, anti-Iba-1 antibody, and DAPI. The lower panels in b show higher magnifications of the boxed regions in the upper panel. (c-d) Levels of FPN, DMT1, Ft-L, and Ft-H were examined by immunoblotting ( $\alpha$ -tubulin was used as a loading control). The scale bars in the upper panels in a and b represent 50  $\mu$ m, and those in the lower panels represent 20  $\mu$ m. Representative images are presented in c and quantified data are presented as means  $\pm$  SEMs (n=4). \*p < 0.05, \*\*p < 0.01 vs. control groups.

### Supplementary Figure 3

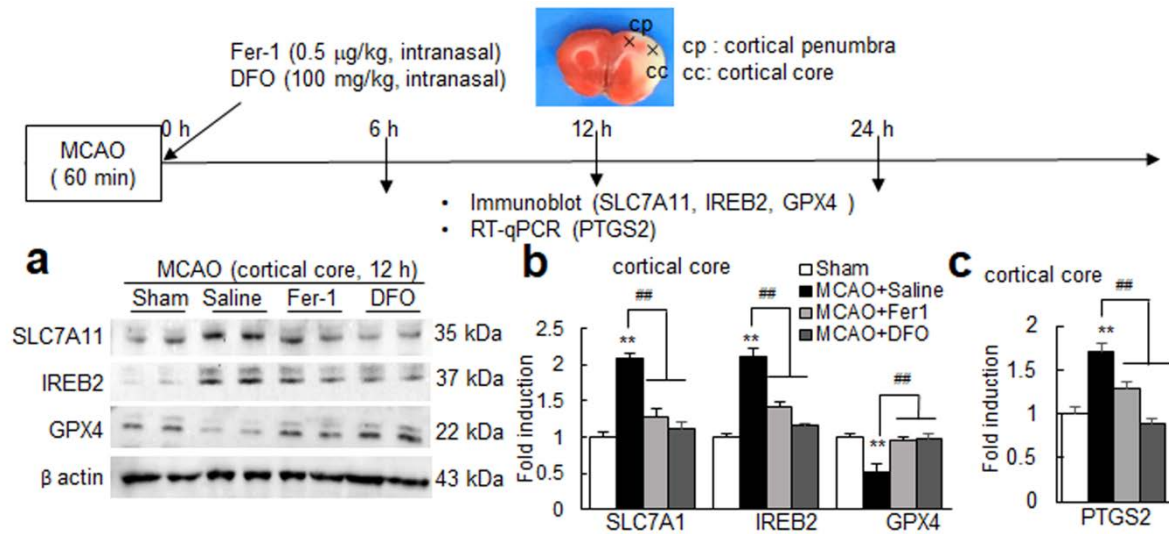

### Supplementary Fig. 3. Ferroptosis in the post-ischemic brain (cortical cores)

Fer-1 (0.5 mg/kg) or DFO (100 mg/kg) were administered intranasally immediately after suture removal. (a-b) Levels of SLC7A11, IREB2, and GPX4 in cortical cores of ischemic hemispheres at 12 h post-MCAO were determined by immunoblotting. Representative images are presented in a and quantified results are presented as means  $\pm$  SEMs (n=4) in b. (c) Levels of PTGS2 in cortical cores of ischemic hemispheres at 12 h post-MCAO were determined by RT-qPCR. Sham, sham-operated animals (n=4); MCAO+PBS, PBS-administered MCAO animals (n=4); MCAO+Fer-1, Fer-1-administered MCAO animals (n=4); MCAO+DFO, DFO-administered MCAO animals (n=4). \*\*p < 0.01 vs. sham-operated group and ##p < 0.01 between indicated groups.

## Supplementary Figure 4

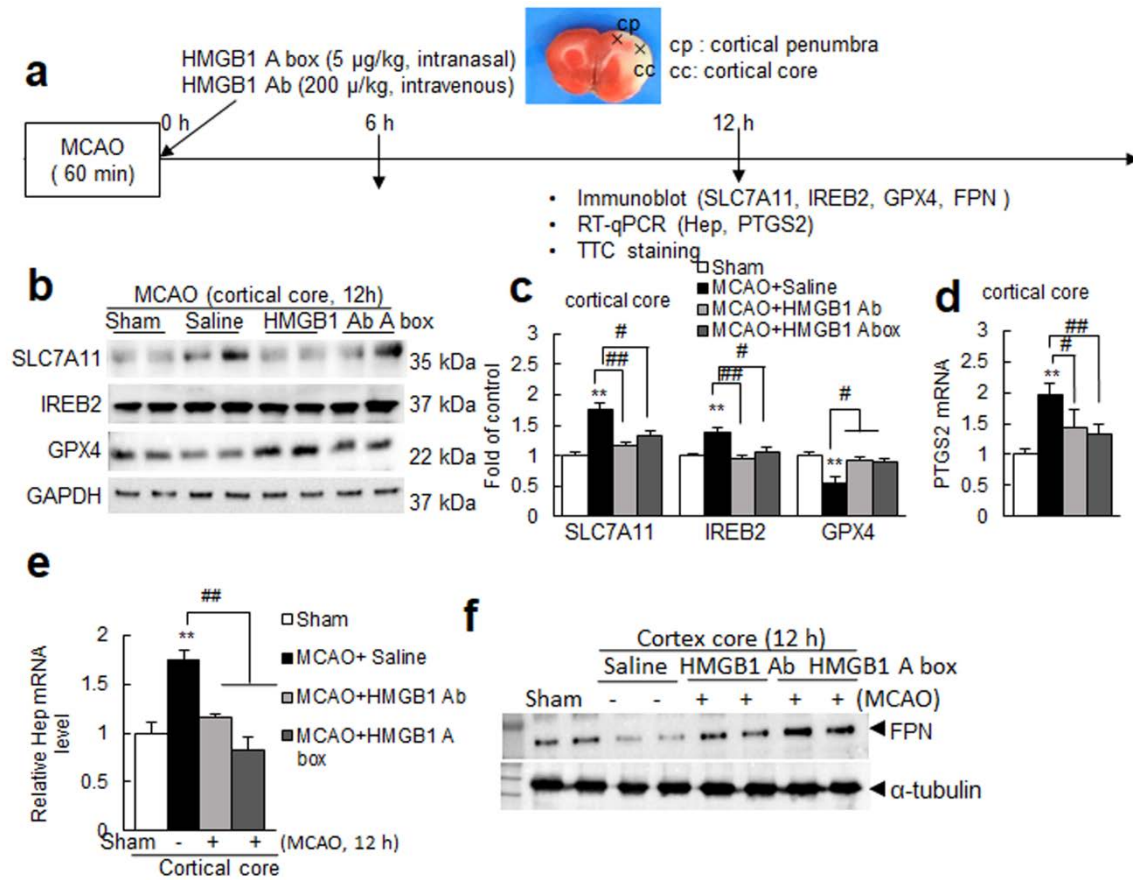

### Supplementary Fig. 4. Blocking HMGB1 function with anti-HMGB1 antibody or HMGB1 A box suppressed ferroptosis in cortical cores in the post-ischemic brain

(a) HMGB1 A box (5  $\mu$ g/kg) or anti-HMGB1 antibody (200  $\mu$ g/kg) were administered intranasally and intravenously, respectively, immediately after suture removal. (b-c) Levels of SLC7A11, IREB2, and GPX4 in cortical cores of ischemic hemispheres at 12 h post-MCAO were determined by immunoblotting. Representative images are presented in b, and results are presented as means  $\pm$  SEMs (n=4) in c. (d) Levels of PTGS2 in cortical cores of ischemic hemispheres at 12 h post-MCAO were determined by RT-qPCR. (e, f) Levels of Hep and FPN in the cortical cores of ischemic hemispheres at 12 h post-MCAO were determined by RT-qPCR and immunoblotting, respectively. Sham, sham-operated animals; MCAO+PBS, PBS-administered MCAO animals; MCAO+HMGB1 Ab, anti-HMGB1 Ab-administered MCAO animals; MCAO+HMGB1 A box, HMGB1 A box-administered MCAO animals. \*\*p < 0.01 vs. sham-operated group and #p < 0.05, ##p < 0.01 between indicated groups.

## Supplementary Figure 5

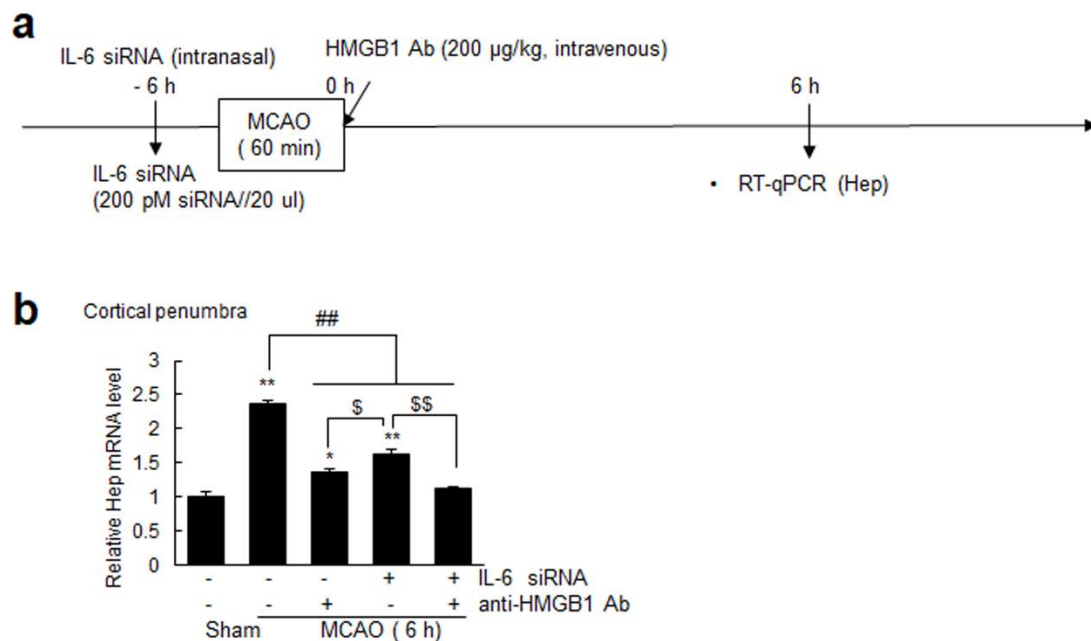

**Supplementary Fig. 5.** Contribution of HMGB1 to hepcidin upregulation in the post-ischemic brain in the absence of IL-6

(a) IL-6 siRNA (200 pM) dissolved in a 5% glucose solution was mixed with in vivo-jetPEI to an N/P ratio of 7, and a total of 20 µl of the siRNA-jetPEI complex was administered intranasally 6 h before MCAO. Anti-HMGB1 antibody (200 µg/kg) was administered intravenously immediately after suture removal. (b) Levels of hepcidin mRNA in the cortical penumbras of ischemic hemispheres at 6 h post-MCAO were determined by RT-qPCR. Sham, sham-operated animals; MCAO, saline-administered MCAO animals; MCAO+IL-6 siRNA, MCAO+IL-6 siRNA-administered MCAO animals; MCAO+HMGB1 Ab, anti-HMGB1 Ab-administered MCAO animals. \* $p < 0.05$ , \*\* $p < 0.01$  vs. sham-operated group and  $^{##} p < 0.01$ ,  $^{\$} p < 0.05$ ,  $^{$$} p < 0.01$  between indicated groups.



## Supplementary Figure 6

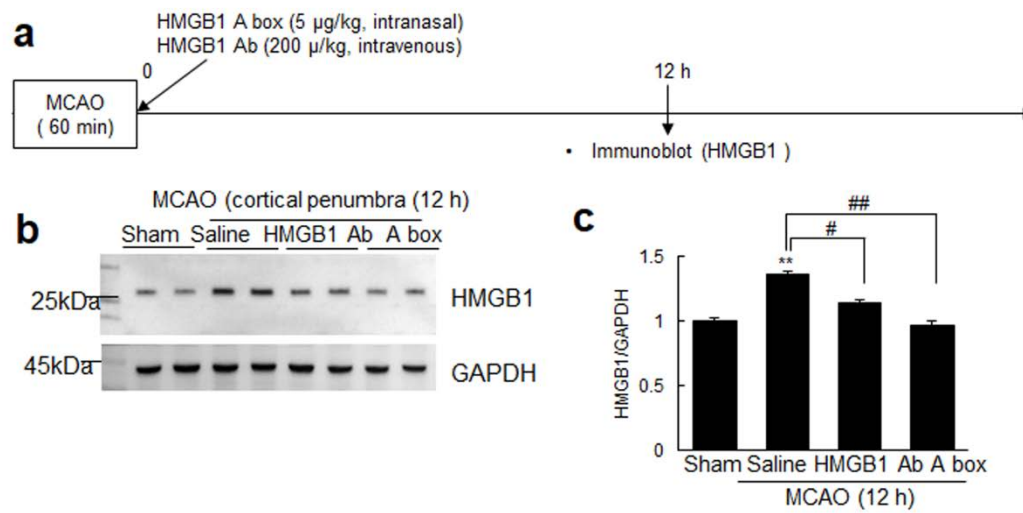

**Supplementary Fig. 6. Administration of anti-HMGB1 antibody or HMGB1 A box suppressed HMGB1 induction in the post-ischemic brain**

(a) HMGB1 A box (5 µg/kg) or anti-HMGB1 antibody (200 µg/kg) were administered intranasally and intravenously, respectively, immediately after suture removal. (b-c) Levels of HMGB1 in cortical penumbras of ischemic hemispheres at 12 h post-MCAO were determined by immunoblotting. Images are presented in b, and results are presented as means  $\pm$  SEMs (n=4) in c. Sham, sham-operated animals; MCAO+Saline, Saline-administered MCAO animals; MCAO+HMGB1 Ab, anti-HMGB1 Ab-administered MCAO animals; MCAO+HMGB1 A box, HMGB1 A box-administered MCAO animals. \*\* $p < 0.01$  vs. sham-operated group and # $p < 0.05$ , ## $p < 0.01$  between indicated groups.

## Supplementary Figure 7

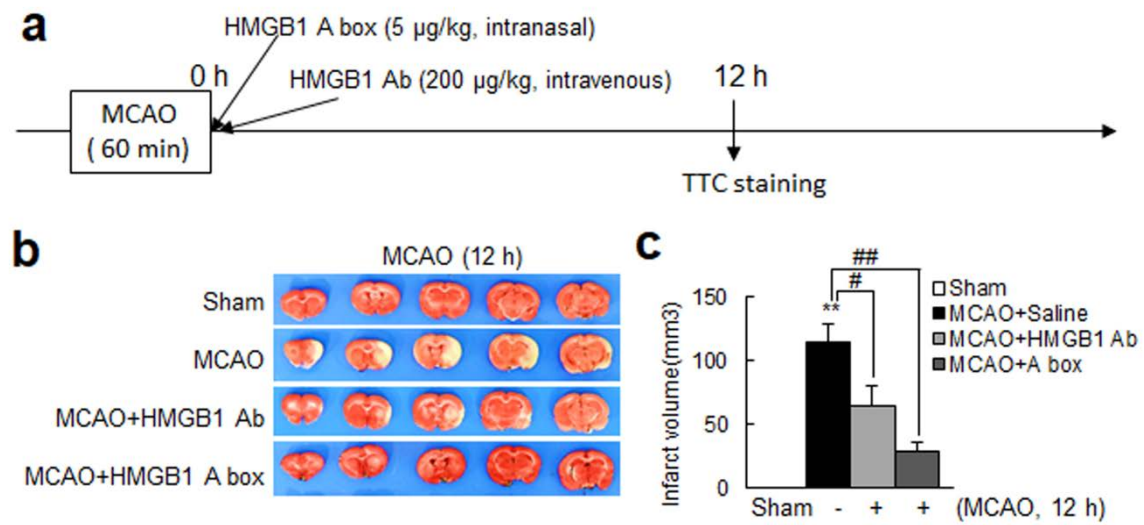

**Supplementary Fig. 7. Blocking HMGB1 function with anti-HMGB1 antibody and HMGB1 A box suppresses infarct formation in the post-ischemic brain**

(a) HMGB1 A box (5 µg/kg) and anti-HMGB1 antibody (200 µg/kg) was administered intranasally and intravenously, respectively, immediately after removing the suture. Coronal brain sections were prepared at 12 h post-MCAO and TTC staining was conducted (b) and mean infarct volumes were determined and are presented as means  $\pm$  SEMs (c) (n=6). Sham, sham-operated animals; MCAO+PBS, PBS-administered MCAO animals; MCAO+HMGB1 Ab, anti-HMGB1 Ab-administered MCAO animals; MCAO+HMGB1 A box, HMGB1 A box-administered MCAO animals. \*\*p < 0.01 vs. sham-operated group and # p < 0.05, ## p < 0.01 between indicated groups.
